# Supplementary material
Source: PubMed Central journal article supplement (PMC4275451)
Supplement: Suplement.pdf [file Suplement.pdf]

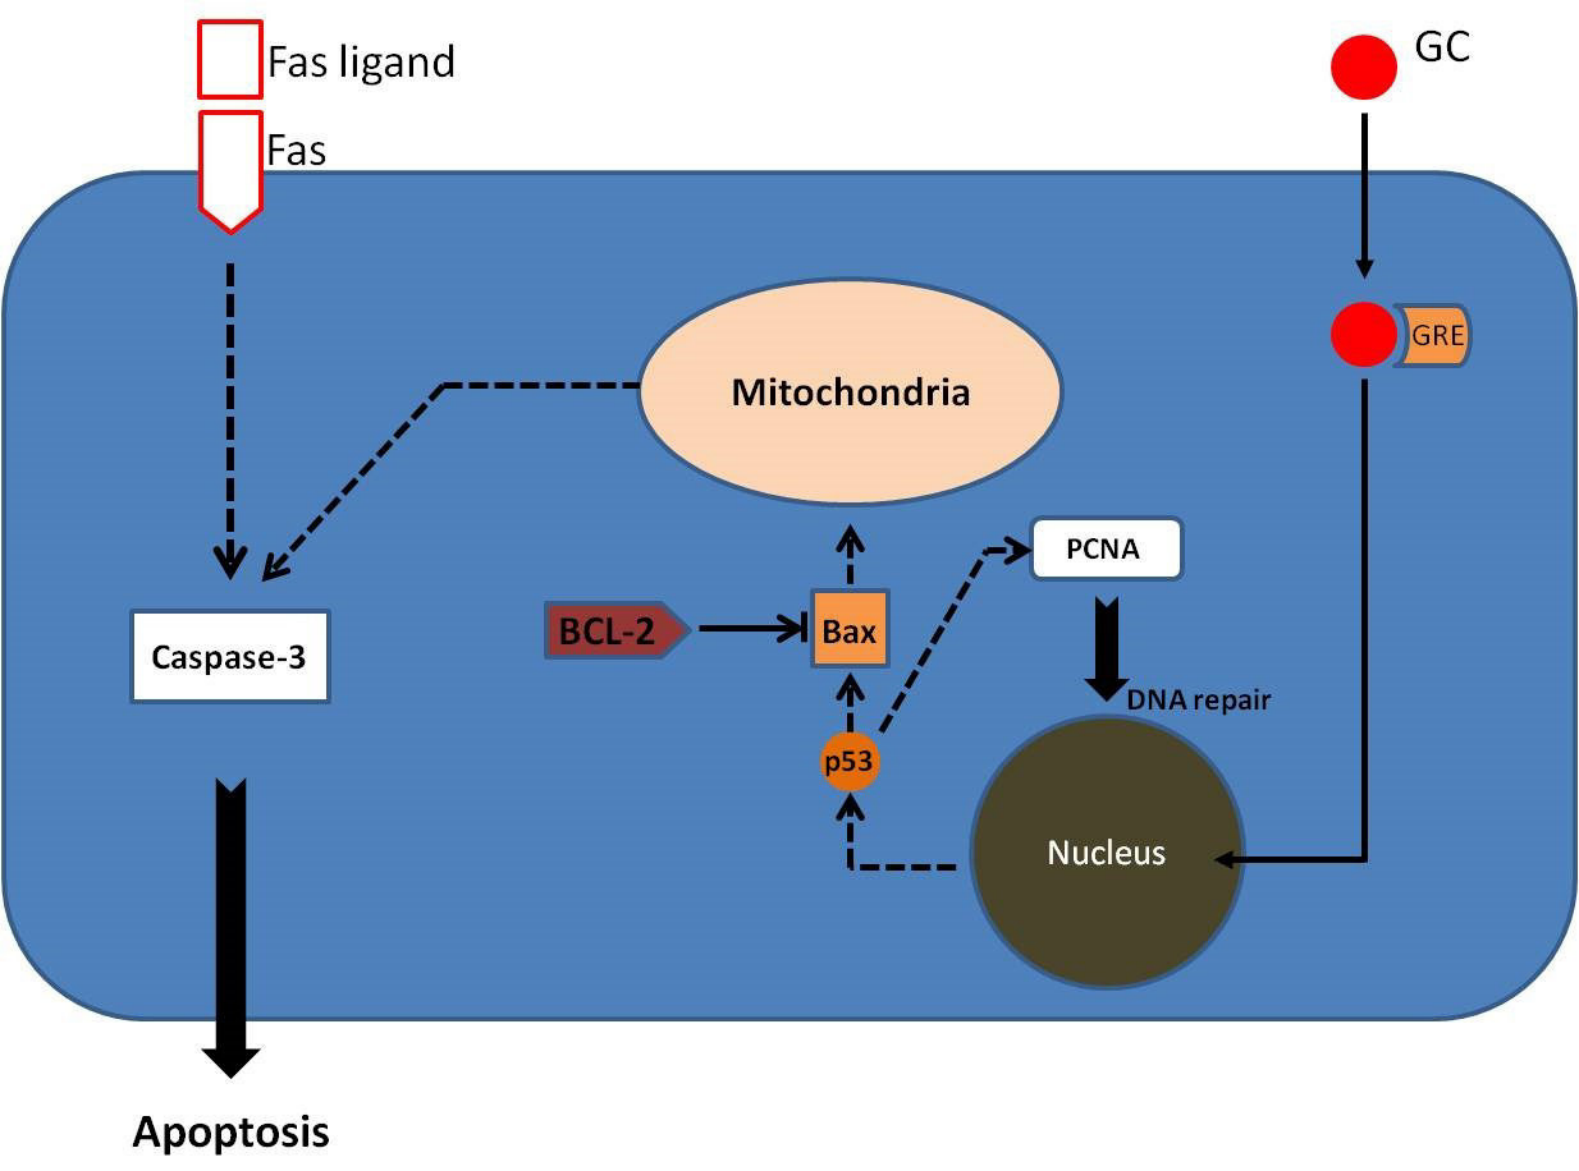

**A) The effect of DEX on PCNA mRNA expression**

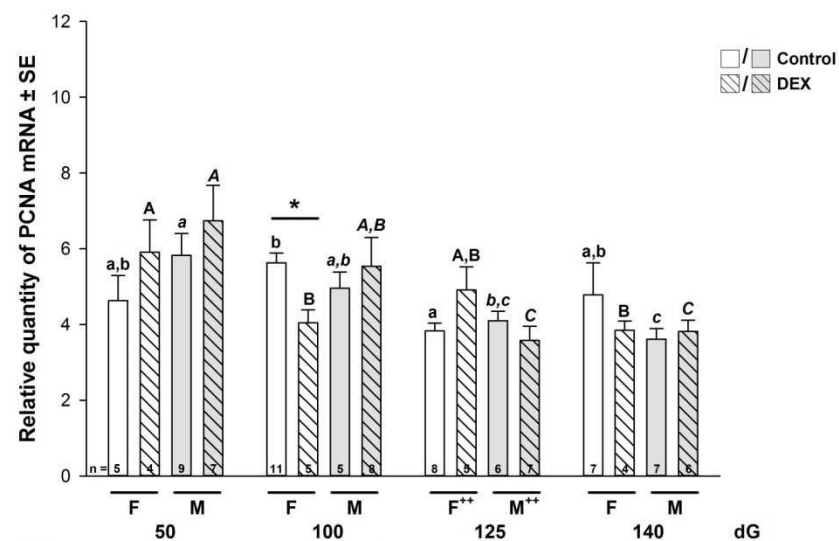

**C) The effect of DEX on FAS mRNA expression**

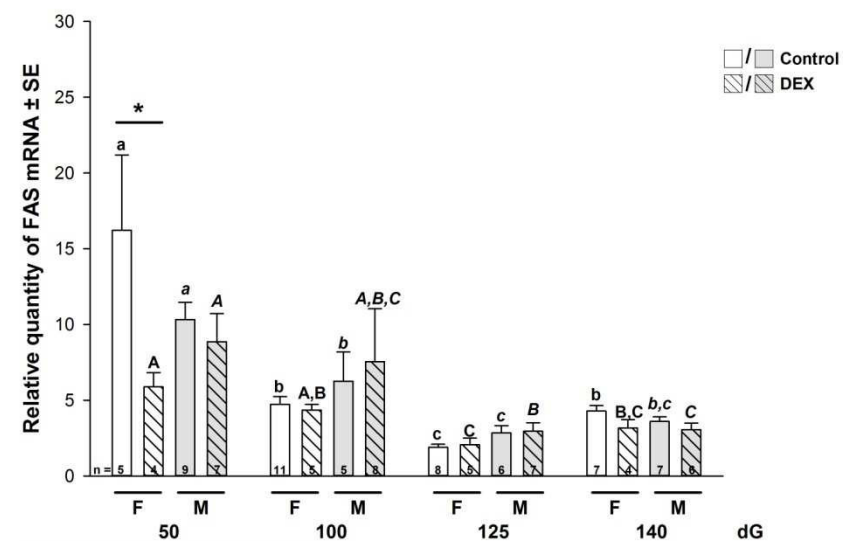

**B) The effect of DEX on BCL-2 mRNA expression**

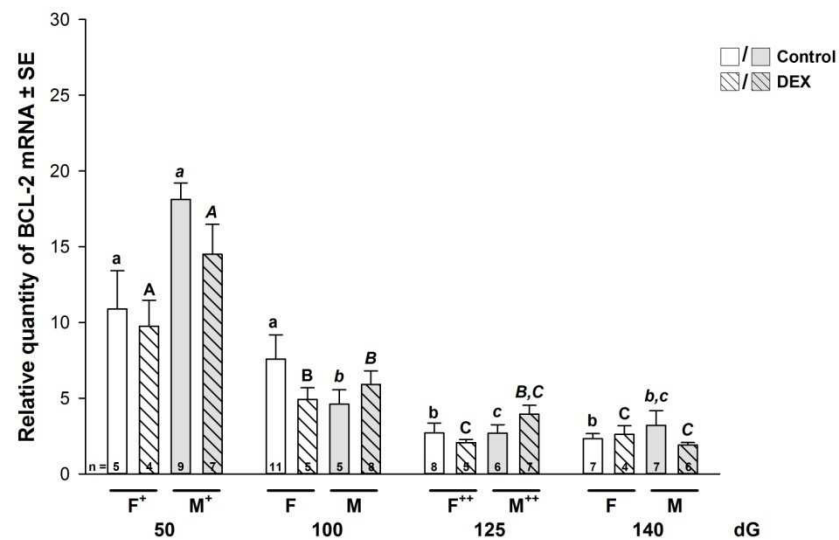

**D) The effect of DEX on Caspase-3 mRNA expression**

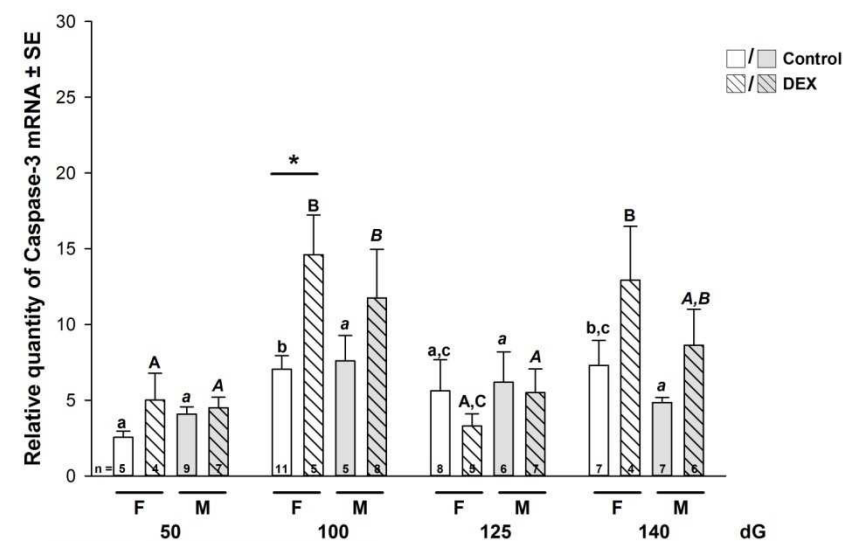

E) The effect of DEX on Bax mRNA expression

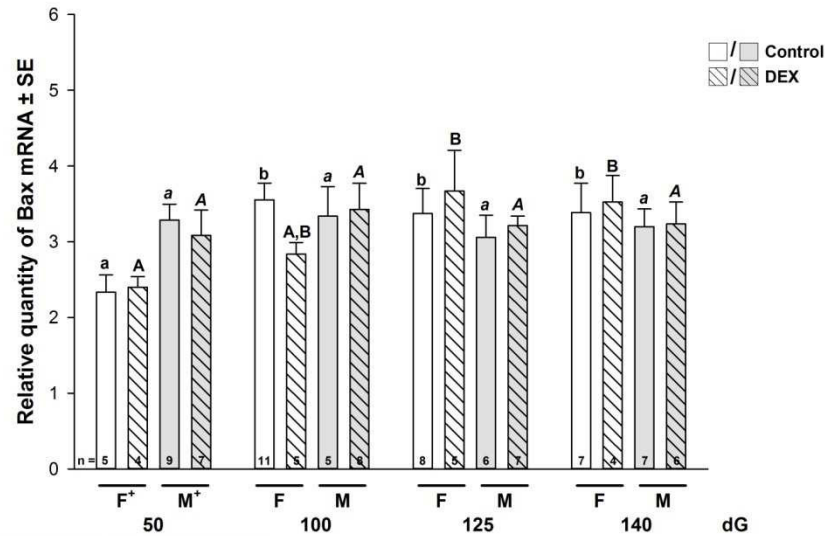

F) The effect of DEX on p53 mRNA expression

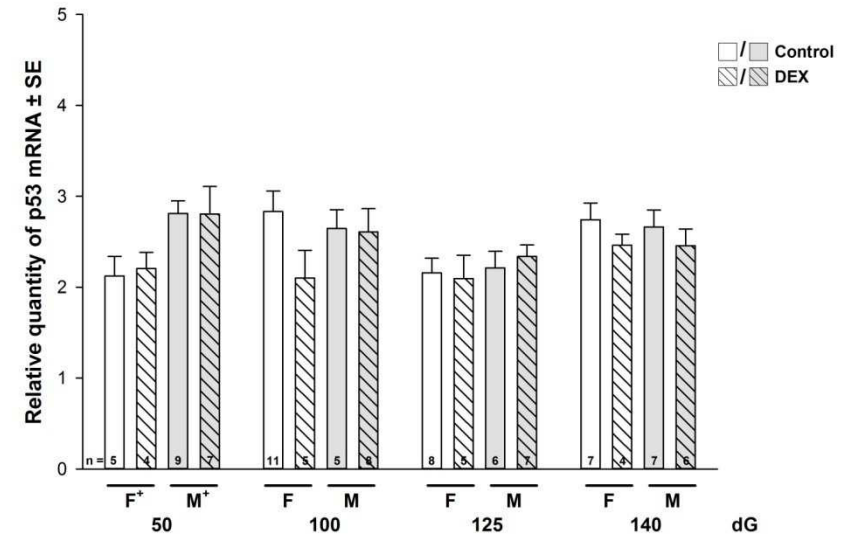

**Figure S2 A-F: The effect of early DEX treatment on placental apoptosis markers (combined data of placentome subtypes).** Mean mRNA expression levels of placental anti-apoptotic markers A) proliferating cell nuclear antigen, PCNA, B) BCL-2 and pro-apoptotic markers C) FAS, D) activated Caspase-3, E) Bax and F) p53. Data was analyzed by MANOVA with treatment, gender and dG as factors, followed by a pairwise comparison (Holm's Sidak) when main effects were  $p < 0.05$ . Different small letters indicate significant differences across gestation within controls (females=normal; males=italic), different capital letters indicate significant differences across gestation within DEX (females=normal; males=italic). n=numbers of animals analyzed. \*represents significant results ( $p < 0.05$ ) of post hoc analysis (Holm Sidak) control versus DEX, +represents post hoc gender differences female versus male in controls; ++represents post hoc gender differences female versus male in DEX.

| A) Females                               | No. of BNC | 1 <sup>st</sup> band | oPL protein<br>2 <sup>nd</sup> band | 1 <sup>st</sup> /2 <sup>nd</sup> band | plasma oPL<br>fetal | maternal | PCNA   | mRNA expression of apoptotic markers<br>BCL-2 | FAS    | Caspase3 | Bax    | p53    | Fetal weight | Placentome<br>number |
|------------------------------------------|------------|----------------------|-------------------------------------|---------------------------------------|---------------------|----------|--------|-----------------------------------------------|--------|----------|--------|--------|--------------|----------------------|
| Controls:                                |            |                      |                                     |                                       |                     |          |        |                                               |        |          |        |        |              |                      |
| oPL protein:                             |            |                      |                                     |                                       |                     |          |        |                                               |        |          |        |        |              |                      |
| 1 <sup>st</sup> band                     | -0.486     | -0.486               |                                     | +0.667                                |                     |          |        |                                               |        |          |        |        |              |                      |
| 2 <sup>nd</sup> band                     |            |                      |                                     |                                       |                     | +0.578   |        | -0.429                                        |        | +0.425   |        |        | +0.674       |                      |
| 1 <sup>st</sup> /2 <sup>nd</sup> band    | -0.488     | +0.667               |                                     |                                       | +0.423              |          |        | +0.421                                        |        |          |        |        | -0.474       |                      |
| oPL plasma:                              |            |                      |                                     |                                       |                     |          |        |                                               |        |          |        |        |              |                      |
| fetal                                    | -0.523     |                      |                                     | +0.423                                |                     |          |        |                                               |        |          |        |        |              |                      |
| maternal                                 | +0.537     |                      | +0.578                              |                                       |                     |          |        | -0.422                                        |        |          |        |        | +0.811       |                      |
| pro- and anti-<br>apoptotic markers:     |            |                      |                                     |                                       |                     |          |        |                                               |        |          |        |        |              |                      |
| PCNA                                     |            |                      |                                     |                                       |                     |          |        |                                               |        |          |        | +0.462 |              | +0.426               |
| BCL2                                     |            |                      | -0.429                              | +0.421                                |                     | -0.422   |        |                                               |        |          |        |        | -0.591       |                      |
| FAS                                      |            |                      |                                     |                                       |                     |          |        |                                               |        |          | -0.424 |        | -0.434       |                      |
| Caspase3                                 |            |                      | +0.425                              |                                       |                     |          |        |                                               |        |          | +0.532 |        |              |                      |
| Bax                                      | +0.539     |                      |                                     |                                       |                     |          |        |                                               | -0.424 | +0.532   |        | +0.714 |              |                      |
| p53                                      |            |                      |                                     |                                       |                     |          | +0.462 |                                               |        |          |        | +0.714 |              |                      |
| Fetal weight                             | +0.719     |                      |                                     | -0.474                                |                     | +0.811   |        | -0.591                                        | -0.434 |          |        |        |              |                      |
| Placentome number                        |            |                      | +0.674                              |                                       |                     |          | +0.426 |                                               | -0.573 |          |        |        |              |                      |
| Placenta weight                          |            | +0.412               |                                     |                                       |                     | +0.542   |        |                                               |        |          |        |        | +0.516       | +0.406               |
| DEX:                                     |            |                      |                                     |                                       |                     |          |        |                                               |        |          |        |        |              |                      |
| oPL protein                              |            |                      |                                     |                                       |                     |          |        |                                               |        |          |        |        |              |                      |
| 1 <sup>st</sup> band                     |            |                      | +0.535                              |                                       | +0.552              |          |        | -0.477                                        |        |          |        |        |              | +0.491               |
| 2 <sup>nd</sup> band                     |            | +0.535               |                                     |                                       |                     | +0.620   |        | -0.525                                        | -0.541 |          |        |        |              |                      |
| 1 <sup>st</sup> /2 <sup>nd</sup> band    |            |                      |                                     |                                       |                     |          |        |                                               |        |          |        |        |              |                      |
| oPL Plasma:                              |            |                      |                                     |                                       |                     |          |        |                                               |        |          |        |        |              |                      |
| fetal                                    | -0.837     | +0.552               |                                     |                                       |                     |          |        |                                               |        |          |        | -0.712 |              |                      |
| maternal                                 |            |                      | +0.620                              |                                       |                     |          |        | -0.631                                        | -0.760 |          |        |        | +0.599       |                      |
| mRNA expression of<br>apoptotic markers: |            |                      |                                     |                                       |                     |          |        |                                               |        |          |        |        |              |                      |
| PCNA                                     |            |                      |                                     |                                       |                     |          |        |                                               |        |          |        |        |              |                      |
| BCL2                                     |            | -0.477               | -0.525                              |                                       |                     | -0.631   |        |                                               | +0.794 |          |        |        | -0.693       |                      |
| FAS                                      |            |                      | -0.541                              |                                       |                     | -0.706   |        | +0.794                                        |        |          |        |        | -0.589       |                      |
| Caspase3                                 |            |                      |                                     |                                       |                     |          |        |                                               |        |          |        |        |              |                      |
| Bax                                      | +0.632     |                      |                                     |                                       |                     |          |        |                                               |        |          |        | +0.567 | +0.532       |                      |
| p53                                      | +0.837     |                      |                                     |                                       | -0.712              |          |        |                                               |        |          | +0.567 |        |              |                      |
| Fetal weight                             | +0.860     |                      |                                     |                                       |                     | +0.599   |        | -0.693                                        | -0.589 |          | +0.532 |        |              |                      |
| Placentome number                        |            | +0.491               |                                     |                                       |                     | +0.469   |        |                                               |        |          |        |        |              |                      |
| Placenta weight                          |            | +0.599               | +0.444                              |                                       |                     |          | -0.588 | -0.750                                        | -0.604 |          |        |        | +0.745       |                      |

| B) Males                                 | No. of BNC | 1 <sup>st</sup> band | oPL protein<br>2 <sup>nd</sup> band | 1 <sup>st</sup> /2 <sup>nd</sup> band | plasma oPL<br>fetal | maternal | PCNA   | mRNA expression of apoptotic markers<br>BCL-2 | FAS    | Caspase3 | Bax    | p53    | Fetal weight | Placentome<br>number |
|------------------------------------------|------------|----------------------|-------------------------------------|---------------------------------------|---------------------|----------|--------|-----------------------------------------------|--------|----------|--------|--------|--------------|----------------------|
| Controls:                                |            |                      |                                     |                                       |                     |          |        |                                               |        |          |        |        |              |                      |
| oPL protein:                             |            |                      |                                     |                                       |                     |          |        |                                               |        |          |        |        |              |                      |
| 1 <sup>st</sup> band                     |            |                      |                                     | +0.782                                | +0.503              |          | -0.532 | -0.703                                        | -0.518 |          |        |        |              | +0.441               |
| 2 <sup>nd</sup> band                     | +0.664     | +0.498               |                                     |                                       |                     | +0.616   |        | -0.780                                        | -0.645 |          |        |        | +0.801       | +0.497               |
| 1 <sup>st</sup> /2 <sup>nd</sup> band    |            | +0.782               | +0.498                              |                                       | +0.438              |          |        |                                               |        |          |        |        |              |                      |
| oPL plasma:                              |            |                      |                                     |                                       |                     |          |        |                                               |        |          |        |        |              |                      |
| fetal                                    |            | +0.503               |                                     | +0.438                                |                     |          |        | -0.406                                        |        |          |        |        |              |                      |
| maternal                                 | +0.647     |                      | +0.616                              |                                       |                     |          | -0.956 | -0.580                                        | -0.556 |          |        |        | +0.895       |                      |
| pro- and anti-<br>apoptotic markers:     |            |                      |                                     |                                       |                     |          |        |                                               |        |          |        |        |              |                      |
| PCNA                                     |            |                      | -0.532                              |                                       |                     | -0.596   |        | +0.433                                        | +0.614 |          | +0.395 |        | -0.609       |                      |
| BCL2                                     |            | -0.703               | -0.780                              |                                       | -0.406              | -0.580   | +0.433 |                                               | +0.728 |          |        | +0.423 | -0.736       | -0.601               |
| FAS                                      |            | -0.518               | -0.645                              |                                       |                     | -0.556   | +0.614 | +0.728                                        |        |          | +0.400 | +0.556 | -0.665       |                      |
| Caspase3                                 |            |                      |                                     |                                       |                     |          |        |                                               |        |          |        |        |              |                      |
| Bax                                      |            |                      |                                     |                                       |                     |          | +0.395 |                                               | +0.400 |          |        | +0.546 |              |                      |
| p53                                      |            |                      |                                     |                                       |                     |          |        | +0.423                                        | +0.556 |          | +0.546 |        |              |                      |
| Fetal weight                             | +0.731     |                      | +0.801                              |                                       |                     | +0.895   | -0.609 | -0.736                                        | -0.665 |          |        |        |              | +0.415               |
| Placentome number                        |            | +0.441               | +0.497                              |                                       |                     |          |        | -0.601                                        |        |          |        |        | +0.415       | +0.616               |
| Placenta weight                          |            | +0.642               | +0.649                              |                                       | +0.468              | +0.678   | -0.460 |                                               | -0.680 |          |        |        | +0.773       |                      |
| DEX:                                     |            |                      |                                     |                                       |                     |          |        |                                               |        |          |        |        |              |                      |
| oPL protein                              |            |                      |                                     |                                       |                     |          |        |                                               |        |          |        |        |              |                      |
| 1 <sup>st</sup> band                     |            |                      | +0.636                              | +0.587                                |                     | +0.481   |        | -0.608                                        |        |          |        |        |              | +0.564               |
| 2 <sup>nd</sup> band                     | +0.664     | +0.636               |                                     |                                       |                     | +0.714   | -0.389 | -0.669                                        |        |          |        |        | +0.685       | +0.482               |
| 1 <sup>st</sup> /2 <sup>nd</sup> band    |            | +0.587               |                                     |                                       |                     |          |        |                                               |        |          |        |        |              |                      |
| oPL Plasma:                              |            |                      |                                     |                                       |                     |          |        |                                               |        |          |        |        |              |                      |
| fetal                                    |            |                      |                                     |                                       |                     |          |        |                                               |        |          |        |        |              |                      |
| maternal                                 | +0.827     | +0.481               | +0.714                              |                                       |                     |          | -0.518 | -0.737                                        | -0.433 |          |        |        | +0.815       |                      |
| mRNA expression of<br>apoptotic markers: |            |                      |                                     |                                       |                     |          |        |                                               |        |          |        |        |              |                      |
| PCNA                                     |            |                      | -0.389                              |                                       |                     | -0.518   |        | +0.696                                        | +0.719 |          | +0.425 | +0.668 | -0.552       | -0.402               |
| BCL2                                     | -0.594     | -0.608               | -0.669                              |                                       |                     | -0.737   | +0.696 |                                               | +0.607 |          |        | +0.490 | -0.719       |                      |
| FAS                                      |            |                      |                                     |                                       |                     | -0.433   | +0.719 | +0.607                                        |        |          | +0.609 | +0.612 | -0.387       |                      |
| Caspase3                                 |            |                      |                                     |                                       |                     |          |        |                                               |        |          |        |        |              |                      |
| Bax                                      |            |                      |                                     |                                       |                     |          | +0.425 |                                               | +0.609 |          |        | +0.774 |              |                      |
| p53                                      |            |                      |                                     |                                       |                     |          | +0.668 | +0.490                                        | +0.612 |          | +0.774 |        |              |                      |
| Fetal weight                             | +0.793     |                      | +0.685                              |                                       |                     | +0.815   | -0.552 | -0.719                                        | -0.387 |          |        |        |              |                      |
| Placentome number                        |            | +0.564               | +0.482                              |                                       | +0.612              | -0.402   |        |                                               |        |          |        |        |              |                      |
| Placenta weight                          | +0.589     | +0.617               | +0.622                              |                                       |                     |          | -0.537 | -0.768                                        |        |          |        |        | +0.807       | +0.584               |

**Table S1 A-B: The relationship (expressed as Pearson correlation coefficient) between binucleate cell (BNC) number, ovine placental lactogen (oPL) protein level, plasma oPL levels with apoptotic markers and fetal and placental weight and placentome numbers in A) females and B) males.** Pearson correlation between control- and DEX-treated animals. 2-sided significance level set as p<0.05. Data are presented as combined data of placentome subtypes across gestation. Differences after DEX compared with controls are indicated with colour.
